# Supplementary material for: A modification of the leaf-bags method to assess spring ecosystem functioning: benthic invertebrates and leaf-litter breakdown in Vera Spring (Central Italy)
Source: PeerJ. 2019 Feb 13;7:e6250. doi: 10.7717/peerj.6250 (PMC6377591; doi:10.7717/peerj.6250)
Supplement: Supplemental Information 1 — List and abundance of taxa and dry mass loss of poplar leaves in leaf-nets (six replicates) retrieved from Vera Spring after 33 days of incubation, from July 2016 through October 2016. [file peerj-07-6250-s001.xlsx]

## Sheet: Taxa
			July							August							September							October
Taxa	FFG		I	II	III	IV	V	VI		I	II	III	IV	V	VI		I	II	III	IV	V	VI		I	II	III	IV	V	VI
Lumbricidae	CG		0	1	0	0	0	0		0	0	0	0	0	0		0	1	0	1	1	0		0	0	0	0	0	0
Hydrachnidia	PR		6	0	0	0	0	0		0	0	0	0	0	2		0	0	0	0	1	1		3	0	0	1	1	2
Elmis aenea	CG		0	0	0	0	0	0		1	0	0	0	0	1		0	0	0	0	2	0		2	0	0	0	0	0
Chironomidae	CG		28	13	4	34	12	24		2	1	6	5	4	12		9	5	3	4	21	2		7	1	3	0	11	4
Psychodidae	SC		0	0	1	0	0	0		0	0	0	0	0	0		0	0	0	0	0	0		0	0	1	0	0	0
Simuliidae	CF		0	0	0	0	1	0		0	0	0	0	0	0		0	0	0	0	0	0		0	0	0	0	0	0
Tipula sp.	SH		0	0	0	0	2	0		0	1	0	0	0	1		1	0	0	0	0	0		1	1	2	0	0	0
Baetis rhodani	CG		0	0	0	1	1	0		0	0	0	0	0	0		0	0	1	0	0	1		0	0	0	0	1	0
Ecdyonurus venosus	SC		0	0	0	0	0	0		0	0	0	0	0	0		1	0	0	0	0	0		0	0	0	0	0	0
Leuctra fusca	SH		0	1	2	1	3	1		0	0	0	0	0	0		0	0	0	0	0	0		0	0	0	0	2	0
Protonemura spp.	SH		3	0	1	2	11	0		1	0	0	0	1	0		0	1	3	0	0	0		0	0	1	0	0	0
Isoperla saccai	PR		0	0	0	1	0	0		0	0	0	0	0	0		0	0	0	0	1	1		0	0	0	0	0	0
Lepidostomatidae	SH		1	1	0	0	0	0		0	0	0	0	0	0		0	0	0	1	0	0		0	0	0	0	0	0
Drusus aprutiensis	SH		7	3	0	3	2	3		0	0	0	1	0	0		0	2	0	2	2	0		0	0	2	0	1	1
Sericostoma italicum	SH		1	0	0	0	0	0		0	0	0	0	0	0		0	0	0	0	3	0		1	0	0	0	0	0
Gammarus elvirae	SH		65	168	124	59	115	42		38	107	46	177	108	145		3	45	39	101	2	33		11	21	80	55	11	13
Niphargus sp.	SH		0	0	0	0	0	3		0	0	0	0	0	0		0	0	0	0	0	0		0	0	0	0	0	0
Ancylus fluviatilis	SC		0	0	0	0	0	0		0	0	0	0	0	0		0	0	0	0	0	0		0	0	0	0	1	0
Belgrandia minuscula	SC		355	217	58	20	15	17		93	27	250	52	35	23		240	323	31	251	97	14		219	232	61	344	113	83
Bythinella schmidti	SC		10	11	0	1	0	0		2	0	6	4	0	0		4	1	0	10	2	1		2	5	4	17	0	0
Schmidtea polychroa	PR		0	0	0	0	0	0		2	9	15	28	3	33		12	9	4	12	16	20		9	4	15	7	3	2
Elminthidae (larvae)	SC		0	0	1	1	0	1		1	1	0	0	2	2		0	0	0	0	0	1		0	0	1	1	0	0
Chironomidae (pupae)	-		1	0	0	0	0	0		0	0	0	0	0	0		0	0	0	0	0	0		0	0	0	0	0	0
SH = Shredders; SC = Grazers/Scrapers; CG = Collector gatherers; CF = Collector filterers; PR = Predators
List and abundance of invertebrate taxa in modified leaf-bags (six replicates) retrived from Vera Spring after 33 days of incubation, from July 2016 through October 2016

## Sheet: Breakdown
Month	Replicate	Initial dry mass (g)	Remaining dry mass (g)	Remaining dry mass (%)	Dry mass loss (g)	Dry mass loss (%)
July	I	2.99	0.94	31.4381	2.05	68.5619
July	II	3.03	1.03	33.9934	2	66.0066
July	III	2.83	0.95	33.57	1.88	66.4311
July	IV	3.22	0.91	28.2609	2.31	71.7391
July	V	3.58	1.11	31.0056	2.47	68.9944
July	VI	3.96	1.36	34.3434	2.6	65.6566
August	I	2.43	1.22	50.2058	1.21	49.7942
August	II	2.49	0.82	32.9317	1.67	67.0683
August	III	2.54	1	39.3701	1.54	60.6299
August	IV	2.76	0.85	30.7971	1.91	69.2029
August	V	2.9	0.97	33.4483	1.93	66.5517
August	VI	3.03	0.97	32.0132	2.06	67.9868
September	I	2.35	0.95	40.4255	1.4	59.5745
September	II	2.64	1.46	55.303	1.18	44.697
September	III	2.8	1.28	45.7143	1.52	54.2857
September	IV	2.81	1.02	36.2989	1.79	63.7011
September	V	2.83	0.9	31.8021	1.93	68.1979
September	VI	3.03	1.33	43.8944	1.7	56.1056
October	I	2.46	1.24	50.4065	1.22	49.5935
October	II	2.49	1.19	47.7912	1.3	52.2088
October	III	2.68	1.29	48.1343	1.39	51.8657
October	IV	2.76	1.18	42.7536	1.58	57.2464
October	V	2.88	1.6	55.5556	1.28	44.4444
October	VI	2.9	1.33	45.8621	1.57	54.1379
Data on Poplar (Popolus nigra) leaves breakdown in modified leaf-bags (six replicates) retrieved from Vera Spring after 33 days of incubation, from July 2016 through October 2016
